# Supplementary material for: Dual-AAV vector-mediated expression of MYO7A improves vestibular function in a mouse model of Usher syndrome 1B
Source: PubMed Central journal article supplement — Mol Ther Methods Clin Dev. 2023 Aug 21;30:534–45. doi: 10.1016/j.omtm.2023.08.012 (PMC10491803; doi:10.1016/j.omtm.2023.08.012), 2023-08-21
Supplement: mmc1.pdf [file mmc1.pdf]

OMTM, Volume 30

## Supplemental information

### Dual-AAV vector-mediated expression of *MYO7A* improves vestibular function in a mouse model of Usher syndrome 1B

Samantha C. Lau, Mhamed Grati, Kevin Isgrig, Moaz Sinan, Kaitlyn R. Calabro, Jianliang Zhu, Yasuko Ishibashi, Zeynep Ozgur, Talah Wafa, Inna A. Belyantseva, Tracy Fitzgerald, Thomas B. Friedman, Sanford L. Boye, Shannon E. Boye, and Wade W. Chien

## Supplemental Figures

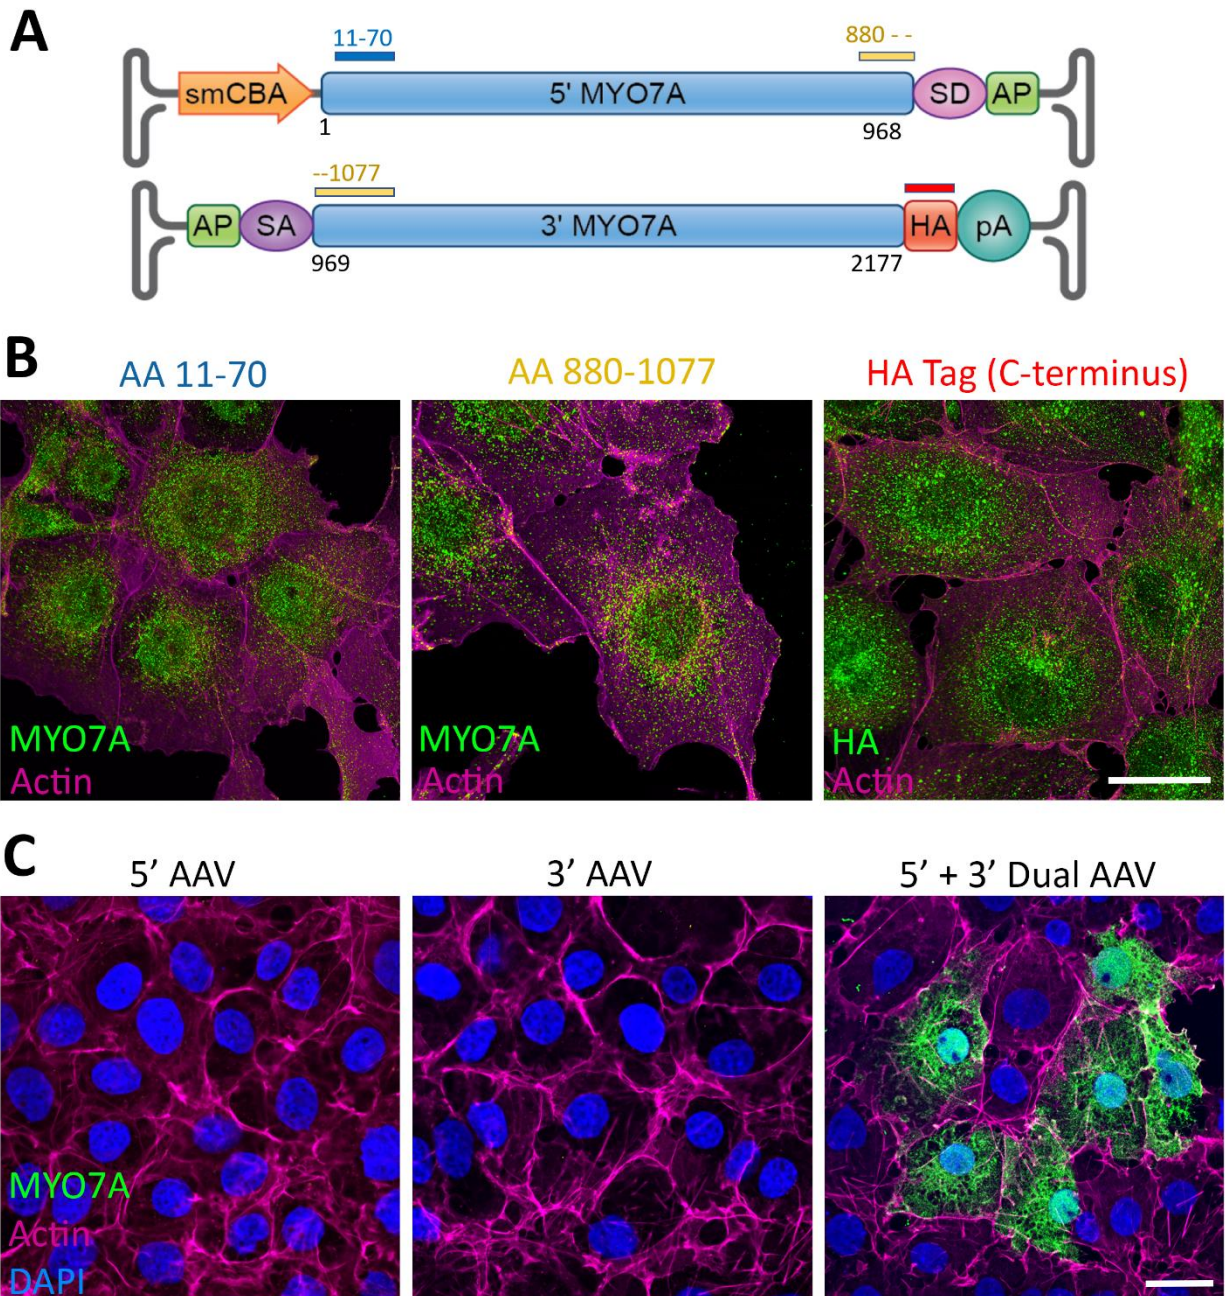

**Figure S1.** Dual-AAV8(Y733F)-*MYO7A* vectors expressed full-length *MYO7A* in COS-7 cells. (A) Schematics of the dual-AAV8(Y733F)-*MYO7A* vectors used in this study. The

human *MYO7A* cDNA was separated into two halves (labeled “5’ *MYO7A*” and “3’ *MYO7A*”), and its expression was driven by the CMV/chicken  $\beta$ -actin promoter (labeled “smCBA”), which was only present in the 5’ vector. The 3’ vector had a polyadenylation signal (pA). The highly recombinogenic coding sequence for alkaline phosphatase (AP), splice donor sites (SD), and splice acceptor sites (SA) were used to facilitate the recombination of the 5’ and 3’ cDNAs. The location of the antigens targeted by both anti-*MYO7A* antibodies as well as the C-terminal HA tag are marked with color coded rectangles. (B) COS-7 cells were infected with the dual-AAV8(Y733F)-*MYO7A* vectors which resulted in the expression of full-length human *MYO7A*. Specimens were imaged using super-resolution AiryScan mode. *MYO7A* was detected using the anti-*MYO7A* antibodies directed against the N-terminus, middle, and C-terminus (anti-HA), with very similar cellular distribution across the three specimens. HA refers to the hemagglutinin tag inserted at the C-terminus which facilitates its detection. Scale bar represents 20  $\mu\text{m}$ . (C) COS-7 cells infected with either the 5’ or 3’ vector alone showed no *MYO7A* expression when the anti-*MYO7A* antibody targeting the middle portion of the protein was used (AA880-1077). Specimens were imaged using confocal mode. *MYO7A* expression was detected when both the 5’ and 3’ vectors were simultaneously used. Scale bar represents 20  $\mu\text{m}$ .

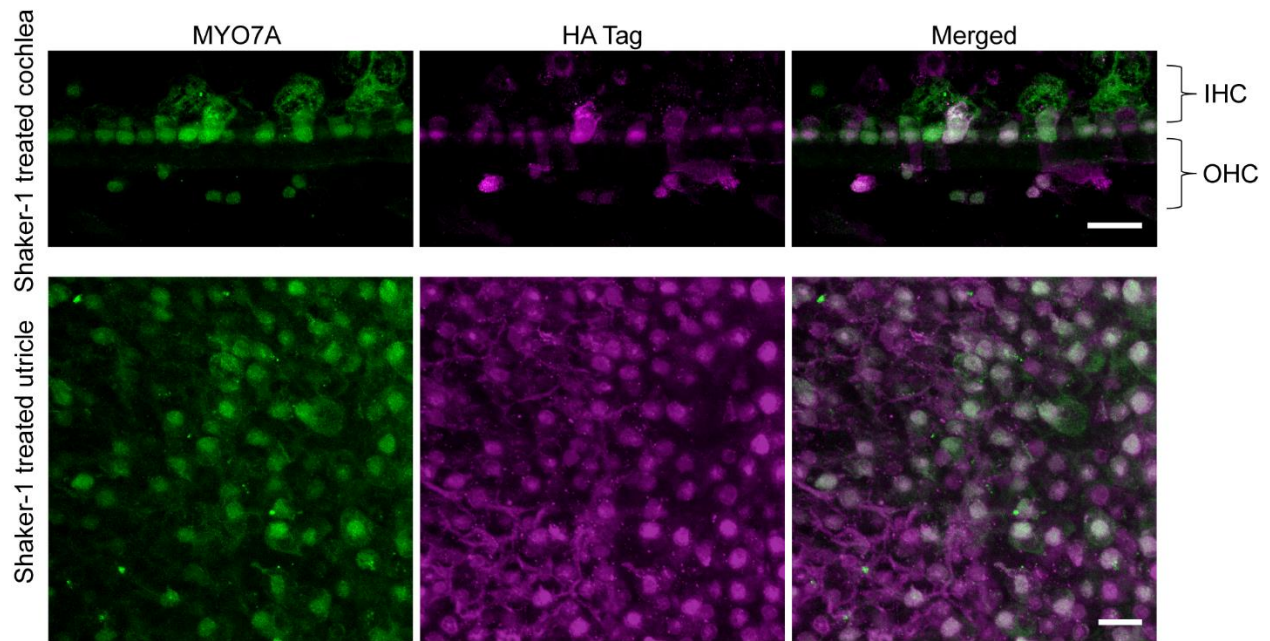

**Figure S2.** MYO7A co-localized with anti-HA antibodies in treated shaker-1 cochlear and vestibular hair cells. Representative confocal images of the cochlea (top row) and the utricle (bottom row) from a shaker-1 mouse treated with dual-AAV8(Y733F)-MYO7A vectors. MYO7A expression in the cochlear and vestibular hair cells of the treated shaker-1 mice co-localized with HA expression. This demonstrates that MYO7A expression in treated shaker-1 mice is mediated by the dual-AAV vectors. The top scale bar from the cochlea represents 20  $\mu\text{m}$ . The bottom scale bar from the utricle represents 10  $\mu\text{m}$ .

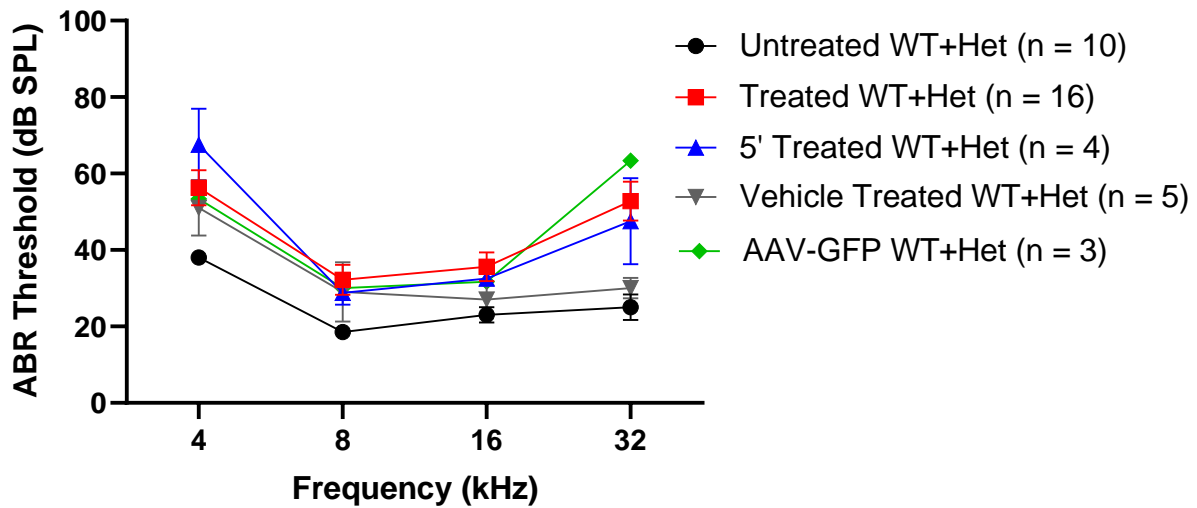

**Figure S3.** Dual-AAV8(Y733F)-*MYO7A* vectors cause an ABR threshold elevation in wild-type and heterozygous littermates. Auditory brainstem response (ABR) thresholds at the four measured frequencies (4, 8, 16, 32 kHz) are shown. ABR testing was done at ~P30. Injection of dual-AAV8(Y733F)-*MYO7A* vectors (labeled “Treated WT+Het”), 5’ vector alone (labeled “5’ Treated WT+Het”), and AAV8(Y733F)-GFP (labeled “AAV-GFP WT+Het”) caused a 10-30 dB ABR threshold elevation in the wild-type (WT) and heterozygous littermates. In contrast, wild-type and heterozygous littermates that were injected with vehicle (PBS with 5% glycerol, labeled “Vehicle Treated WT+Het”) did not show significant ABR threshold elevation compared to untreated wild-type and heterozygous mice (labeled “Untreated WT+Het”). Error bars represent standard errors.
